# Supplementary material for: The Salmonella effector SifA initiates a kinesin-1 and kinesin-3 recruitment process mirroring that mediated by Arl8a and Arl8b
Source: Oxford University Press journal article supplement (doi:10.1242/jcs.259183), 2021-12-08
Supplement: jcs259183supp.pdf [file jcs259183supp.pdf]

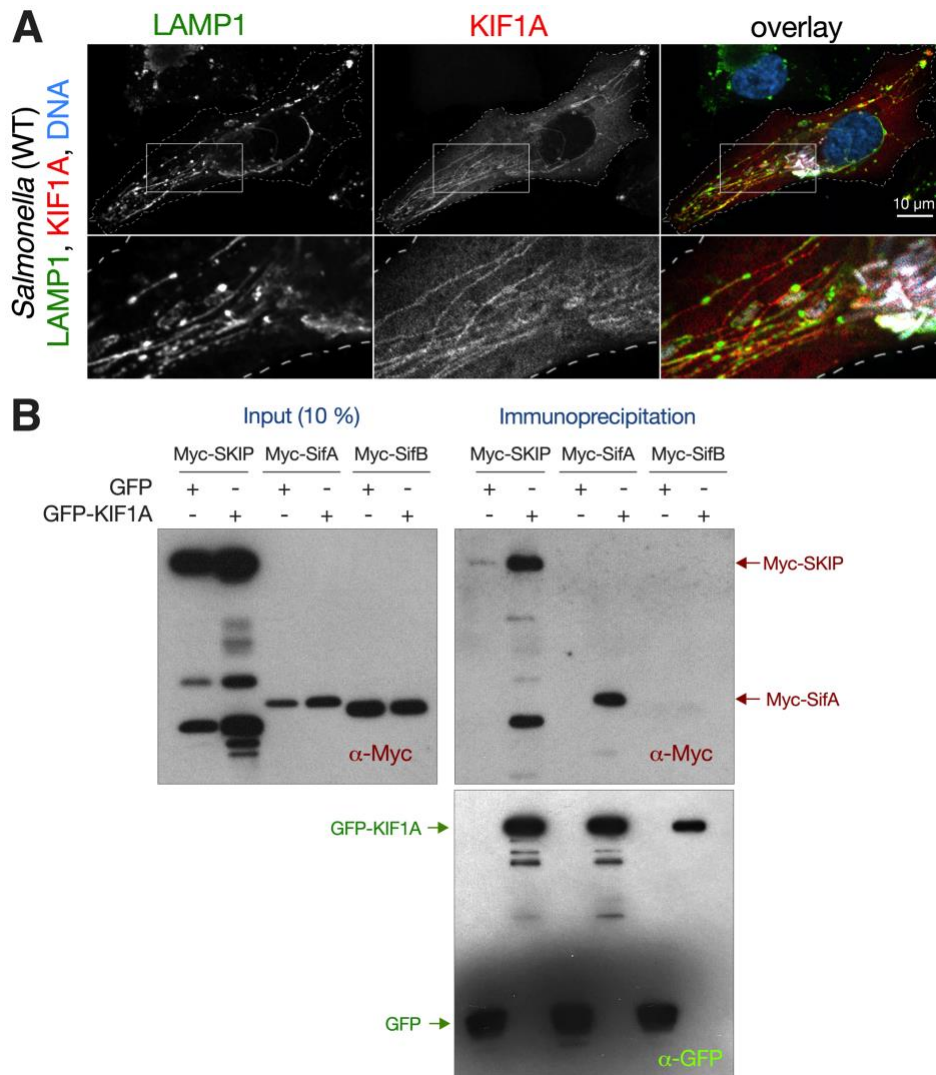

**Fig. S1. KIF1A is present on *Salmonella* compartments and interacts with SifA and SKIP.**

(A) HeLa cells were transfected with plasmids for the expression of GFP-KIF1A and further infected with a wild-type *Salmonella* strain expressing CFP. After 16 hours of infection, cells were fixed, immunostained and imaged for CFP (white), LAMP1 (green), KIF1A (red) and DNA (blue) using confocal microscopy. KIF1A is present on LAMP1 positive SCVs and SITs. The images in the lower row show the insets enlarged three times. Scale bar, 10 or 3,3 µm for the magnified insets. (B) HeLa cells were transfected with plasmids for the expression of GFP or GFP-KIF1A and various Myc-tagged proteins. Immunoprecipitations were performed with GFP-Trap beads. Input and immunoprecipitated proteins (IP) were analysed by Western blotting using anti-Myc and anti-GFP antibodies. KIF1A interacts specifically with SifA and SKIP but not with SifB.

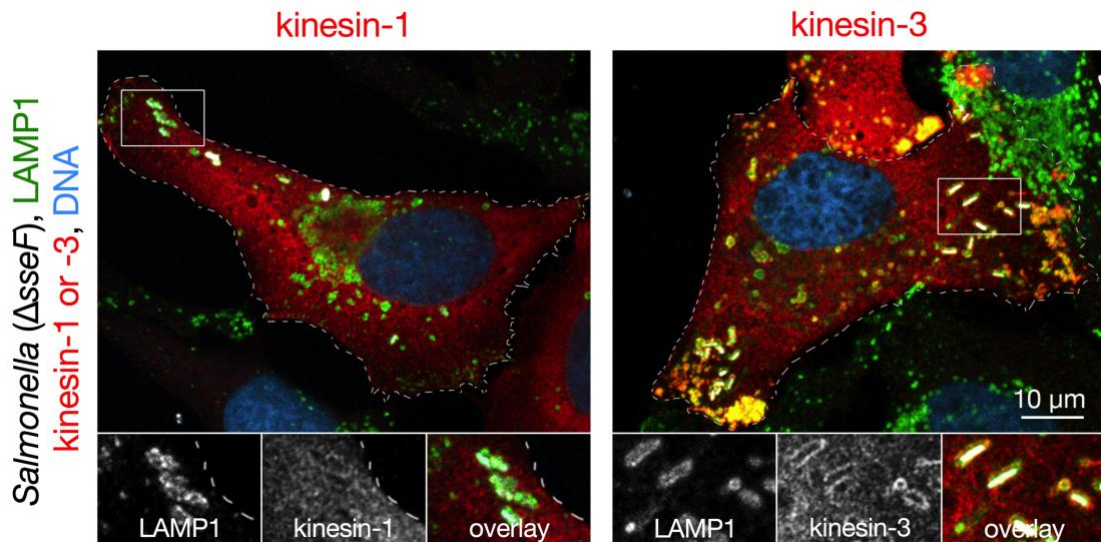

**Fig. S2. Kinesin-3 is present on  $\Delta$ sseF SCVs.**

HeLa cells were transfected with plasmids for the expression of kinesin-1 (HA-KLC2 / HA-KIF5C) or kinesin-3 (FLAG-KIF1B $\beta$ ) and further infected with a  $\Delta$ sseF *Salmonella* mutants expressing GFP. After 16 hours of infection, cells were fixed, immunostained and imaged for GFP (white), LAMP1 (green), kinesin-1/-3 (red) and DNA (light blue) using confocal microscopy. Unlike kinesin-3, kinesin-1 is not detected on  $\Delta$ sseF SCVs. Scale bar, 10 or 5  $\mu$ m for the magnified insets.

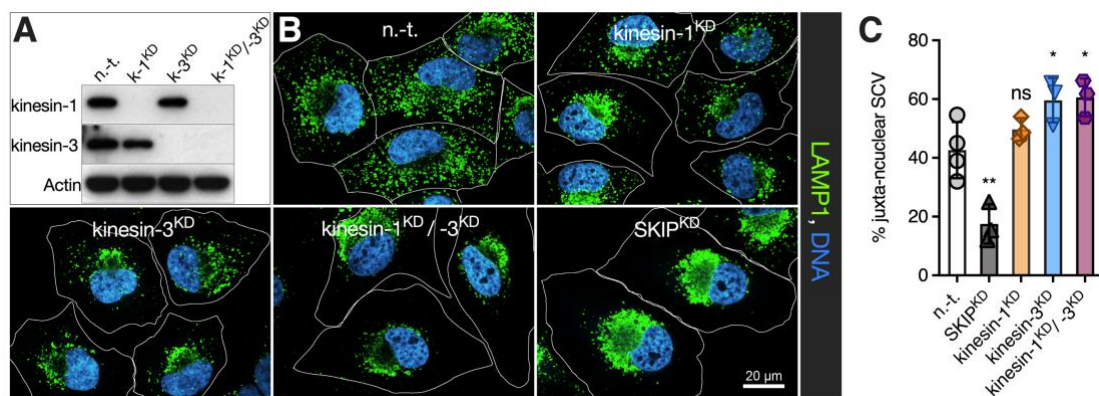

**Fig. S3. Biochemical and microscopic analysis of the silencing of kinesin-1 and/or kinesin-3 in HeLa cells.**

Cells were transfected with a single siRNA for the knock-down of SKIP or a non-targeting siRNA pool (n.-t.) or siRNA pools for the knock-down of kinesin-1(KIF5B) and/or kinesin-3 (KIF1B). **(A)** Western blotting showing the expression of kinesin-1 and kinesin-3 in control cell lysates (n.-t.) or knock-down for one of both kinesins. Actin was used as a loading control. **(B)** After fixation and immunostaining for LAMP1, cells were imaged by confocal microscopy for LAMP1 (green) and DNA (blue). Continuous lines delineate the cells. **(C)** The knocked-down cells were infected with wild-type *Salmonella* expressing GFP for 16 hours, fixed and stained for DNA. The percentages of juxta-nuclear bacteria were scored by epi-fluorescence microscopy. Bacteria were considered to be juxta-nuclear when they were located in the inner third of the cytoplasmic space between the nucleus and the plasma membrane. Data are means  $\pm$  S.D. of at least three independent experiments. Ordinary one-way ANOVA and Dunnett's multiple comparisons test was used to compare the results in the knocked-down cells with those of the control cells. Not significant (ns),  $P > 0.05$ ; \*,  $P < 0.05$ ; \*\*,  $P < 0.01$ .

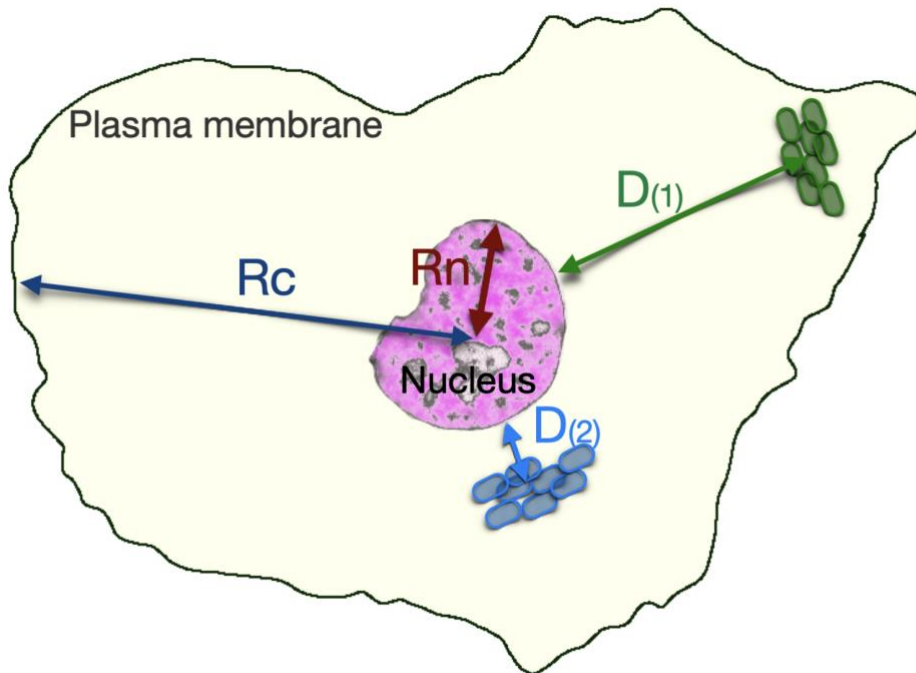

Fractional Distance (FD) =  $D \div (R_c - R_n)$

Green organelles:  $D_{(1)}$  is not very different from  $(R_c - R_n)$ ,  $FD \rightarrow 1$

Blue organelles:  $D_{(2)}$  is much lower than  $(R_c - R_n)$ ,  $FD \rightarrow 0$

**Fig. S4. Definition of fractional distance.**

The fractional distance (FD) was defined as the ratio of the organelle mean distance to nucleus border (D) to the difference between the mean radius of the cell ( $R_c$ ) and the mean radius of the nucleus ( $R_n$ ). The FD was calculated using an internally developed Macro based on the ImageJ Radial Profile plugin and applied to confocal images. The FD tends towards zero when the organelles are close to the nucleus (blue organelles) or towards one when they are close to the plasma membrane (green organelles).

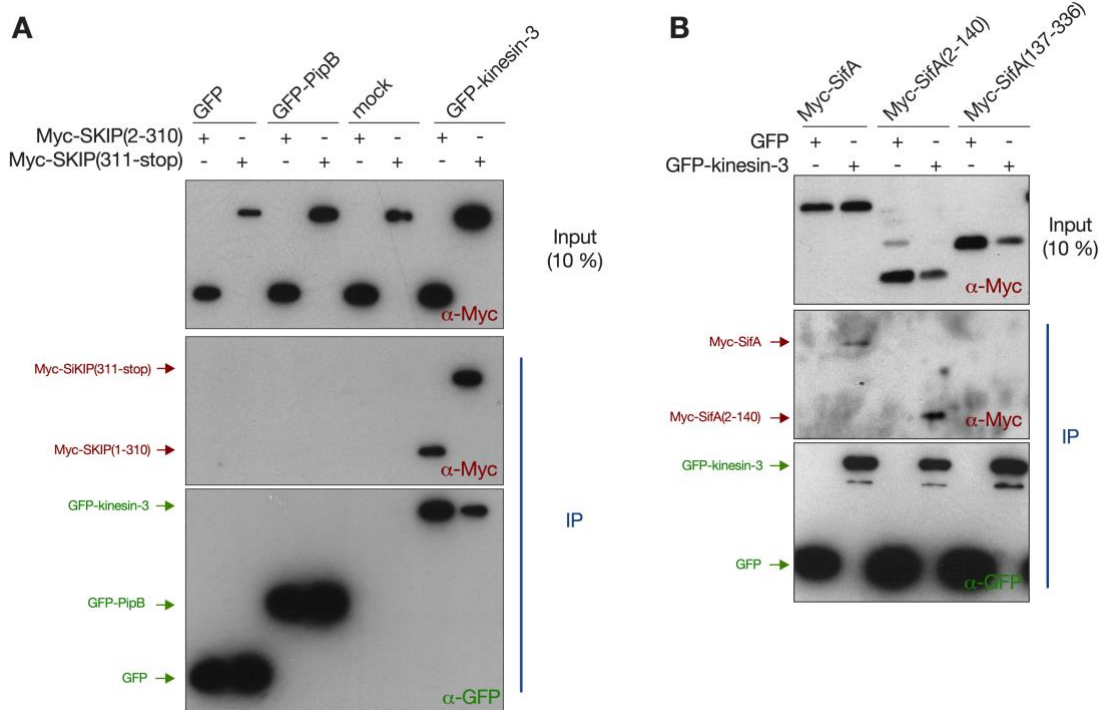

**Fig. S5. Co-immunoprecipitation tests with kinesin-3.**

Cos-7 cells were transfected with plasmids for the expression of various GFP- or Myc-tagged proteins. Immunoprecipitations were performed with GFP-Trap beads. Input and immunoprecipitated proteins (IP) were analysed by Western blotting using anti-Myc and anti-GFP antibodies. **(A)** Kinesin-3 interacts with the N- and C-terminal parts of SKIP. SKIP(2-310) and SKIP(311-stop) co-immunoprecipitate with GFP-kinesin-3 but not with GFP, GFP-PipB or beads only (mock). **(B)** Kinesin-3 interacts with the N-terminal domain of SifA. SifA and its N-terminal domain [SifA(1-140)] specifically co-immunoprecipitate with GFP-kinesin-3, while the C-terminal domain [SifA(137-336)] does not.

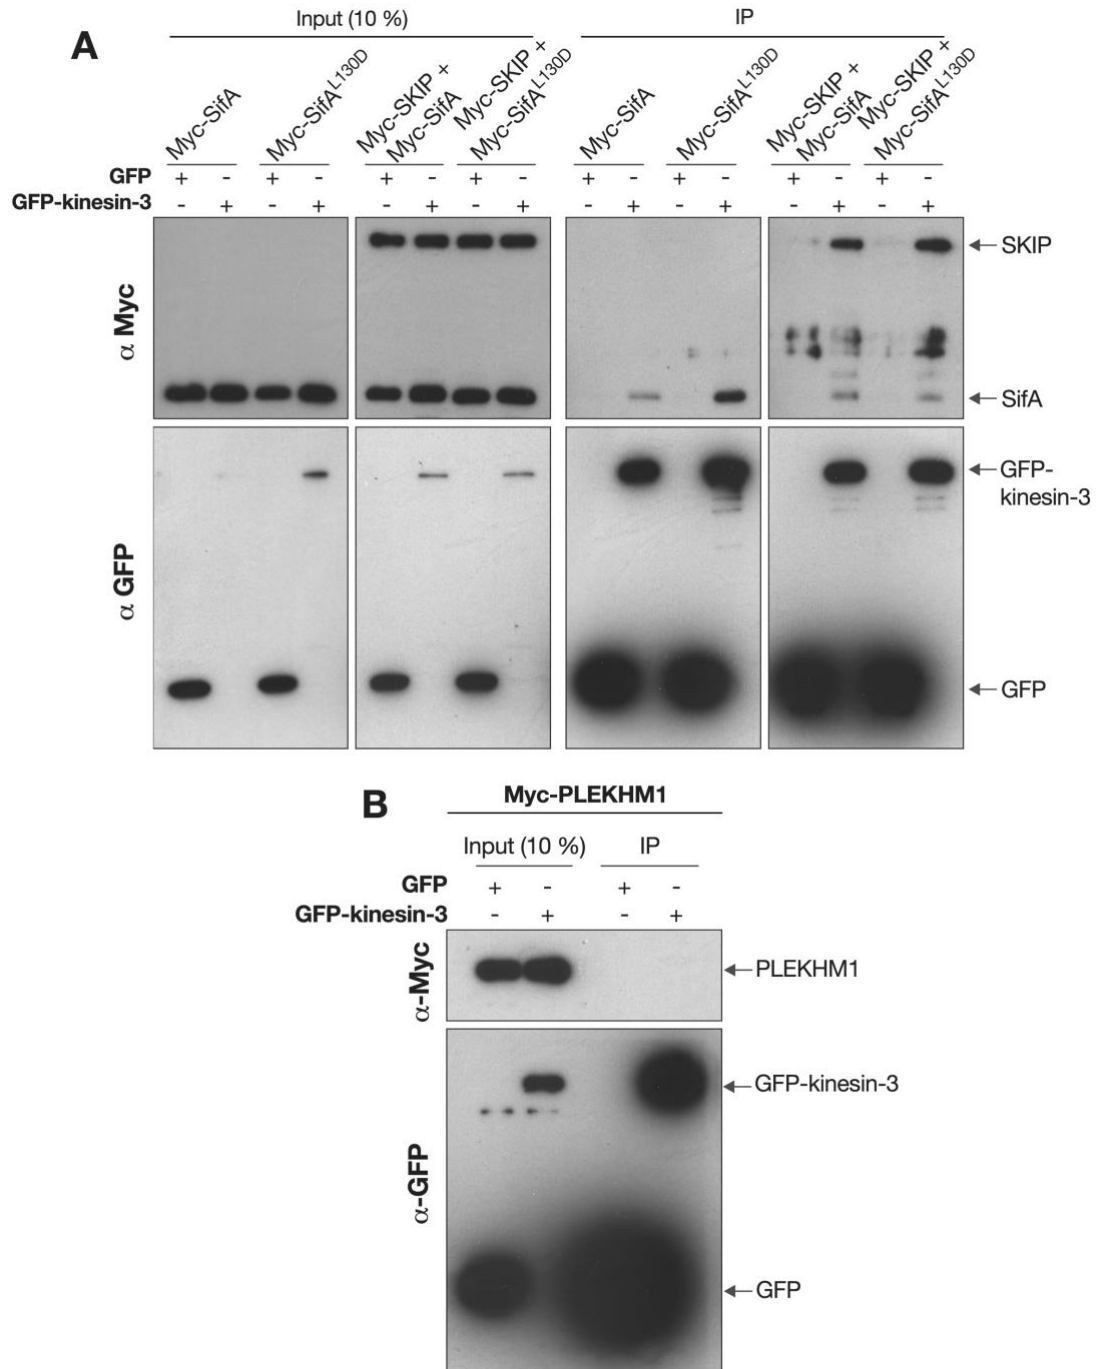

**Fig. S6. Co-immunoprecipitation tests with kinesin-3.**

Cos-7 cells were transfected with plasmids for the expression of GFP or GFP-kinesin-3 and various Myc-tagged proteins. Immunoprecipitations were performed with GFP-Trap beads. Input and immunoprecipitated proteins (IP) were analysed by Western blotting using anti-Myc and anti-GFP antibodies. **(A)** SifA and SKIP do not compete for kinesin-3 binding. SifA or SifA<sup>L130D</sup> specifically co-immunoprecipitate with GFP-kinesin-3 independently of the presence of SKIP. **(B)** Kinesin-3 does not bind PLEKHM1.

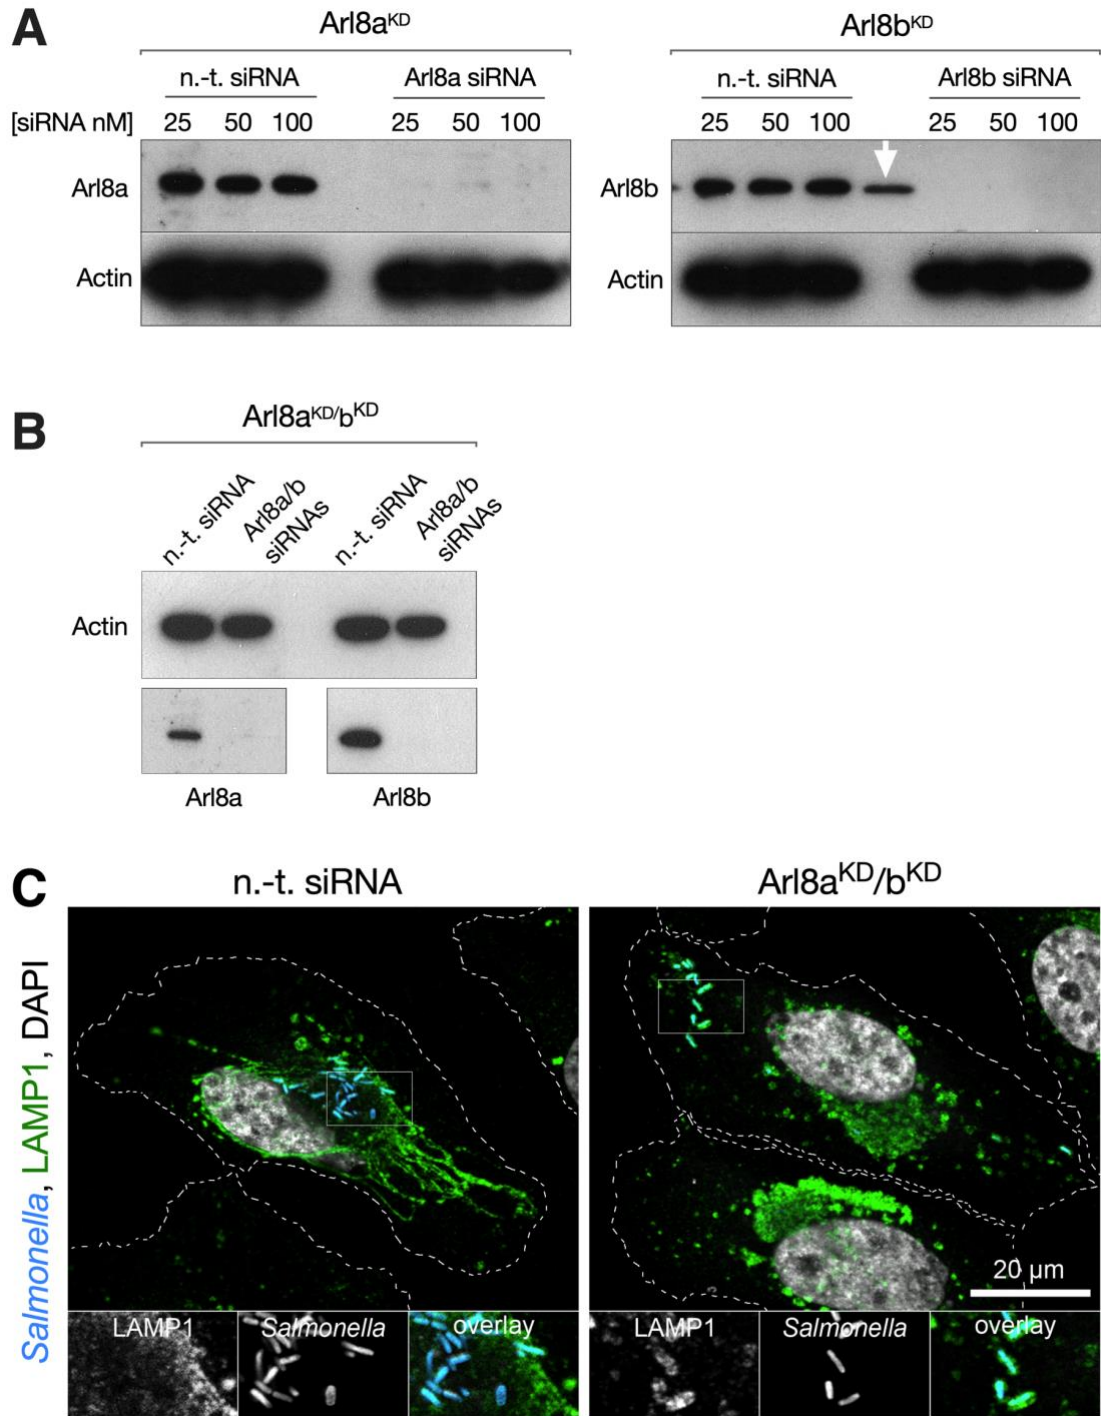

**Fig. S7. Biochemical analysis and consequences of Arl8a and/or Arl8b silencing in *Salmonella*-infected cells.**

HeLa cells were transfected with a non-targeting siRNA pool (n.-t.) or siRNA pools for the knock-down of Arl8a and/or Arl8b. (A) Western blotting showing the expression of Arl8a or Arl8b in control (n.-t.) or knock-down cell lysates for the corresponding GTPase. The white arrow indicates a non-specific band in the Protein Ladder line. (B) Western blotting showing expression of Arl8a and Arl8b in control (n.-t.) or

knockdown cell lysates for both GTPases. **(A and B)** Actin was used as a loading control. **(C)** Control (n.-t.) and Arl8a<sup>KD</sup>/b<sup>KD</sup> cells were infected with wild-type *Salmonella* for 16 hours, fixed and immunostained. Confocal images [(*Salmonella* (blue), LAMP1 (green) and DNA (white)] illustrate the disappearance of SITs and the more peripheral positioning of wild-type SCVs in cells silenced for Arl8a/b. Scale bar, 20 or 10  $\mu$ m for the magnified insets.



**Table S1. Plasmids used in this study**

| Name  | Designation                           | Application                                                                                                                                                              | Reference                                       |
|-------|---------------------------------------|--------------------------------------------------------------------------------------------------------------------------------------------------------------------------|-------------------------------------------------|
| V202  | pEGFP-C1                              | Expression of EGFP in eukaryotic cells                                                                                                                                   | Clontech                                        |
| C259  | pCMV-Myc-SifA                         | Expression of Myc-SifA in eukaryotic cells                                                                                                                               | (Boucrot et al., 2005)                          |
| C1059 | pCMV-Myc-SifA <sup>L130D</sup>        | Expression of Myc-SifA <sup>L130D</sup> in eukaryotic cells                                                                                                              | (Zhao et al., 2015)                             |
| C497  | pCMV-Myc-SifA (2-140)                 | Expression of Myc-SifA(2-140) in eukaryotic cells                                                                                                                        | (Diacovich et al., 2009)                        |
| C1057 | pCMV-Myc-SifA (137-336)               | LR recombination of C1074 with pCMV-Myc <sup>GW</sup> . Expression of Myc-SifA(137-336) in eukaryotic cells                                                              | This study                                      |
| C1074 | pDONR-SifA(137-336)                   | Gateway entry plasmid: BP recombination of the PCR product (oligos O-691/O-693 using <i>S. Typhimurium</i> 12023 genomic DNA as template) with pDONR <sup>TM</sup> / Zeo | This study                                      |
| C252  | pSK-KIAA0842                          | Full length human SKIP in pBlueScript II SK(+)                                                                                                                           | Obtained from the Kazuza DNA Research Institute |
| C254  | pCMV-HA-SKIP                          | Expression of HA-SKIP in eukaryotic cells                                                                                                                                | (Dumont et al., 2010)                           |
| C253  | pCMV-Myc-SKIP                         | Expression of Myc-SKIP in eukaryotic cells                                                                                                                               | (Boucrot et al., 2005)                          |
| C901  | pDONR-SKIP                            | Gateway entry plasmid: BP recombination of the PCR product (oligos O-680/O-681 using C252 as template) with pDONR <sup>TM</sup> / Zeo                                    | This study                                      |
| C904  | pEGFP-SKIP                            | LR recombination of C901 with pEGFP-C1 <sup>GW</sup> . Expression of EGFP-SKIP in eukaryotic cells                                                                       | This study                                      |
| C469  | pCMV-Myc-SKIP(2-310)                  | Expression of Myc-SKIP(2-310) in eukaryotic cells                                                                                                                        | (Dumont et al., 2010)                           |
| C1275 | pDONR-SKIP(311-stop)                  | Gateway entry plasmid: BP recombination of the PCR product (oligos O-780/O-681 using C253 as template) with pDONR <sup>TM</sup> / Zeo                                    | This study                                      |
| C1278 | pCMV-Myc-SKIP(311-stop)               | LR recombination of C1275 with pCMV-Myc <sup>GW</sup> . Expression of Myc-SKIP(311-stop) in eukaryotic cells                                                             | This study                                      |
| C417  | pSK-KIAA0356                          | Full length human PLEKHM1 in pBlueScript II SK(+)                                                                                                                        | From the Kazuza DNA Research Institute          |
| C1227 | pDONR-PLEKHM1                         | Gateway entry plasmid: BP recombination of the PCR product (oligos O-869/O-870 using C417 as template) with pDONR <sup>TM</sup> / Zeo                                    | This study                                      |
| C1233 | pMyc-PLEKHM1                          | LR recombination of C1227 with pCMV-Myc <sup>GW</sup> . Expression of Myc-PLEKHM in eukaryotic cells                                                                     | This study                                      |
| C443  | pCMV-Myc-PipB2                        | Expression of Myc-PipB2 in eukaryotic cells                                                                                                                              | (Henry et al., 2006)                            |
| C330  | pMyc-SifB                             | Expression of Myc-SifB in eukaryotic cells                                                                                                                               | (Deiwick et al., 2006)                          |
| C1188 | pGFP-KIF1A                            | Expression of GFP- KIF1A in eukaryotic cells                                                                                                                             | (Guardia et al., 2016)                          |
| C1189 | pFLAG-KIF1Bβ                          | Expression of FLAG- KIF1Bβ in eukaryotic cells                                                                                                                           | (Schlisio et al., 2008)                         |
| C1225 | pDONR-KIF1Bβ                          | Gateway entry plasmid: BP recombination of the PCR product (oligos O-871/O-837 using C1189 as template) with pDONR <sup>TM</sup> / Zeo                                   | This study                                      |
| C1232 | pEGFP-KIF1Bβ                          | LR recombination of C1225 with pEGFP-C1 <sup>GW</sup> . Expression of EGFP-kinesin-3 in eukaryotic cells                                                                 | This study                                      |
| C1288 | pDONR-KIF1Bβ(363-stop)                | Gateway entry plasmid: BP recombination of the PCR product (oligos O-904/O-837 using C1189 as template) with pDONR <sup>TM</sup> / Zeo                                   | This study                                      |
| C1292 | pCMV-Myc-KIF1Bβ(363-stop)             | LR recombination of C1288 with pCMV-Myc <sup>GW</sup> . Expression of Myc-ML-kinesin-3 in eukaryotic cells                                                               | This study                                      |
| C1193 | pDONR-KIF1Bβ(1324-end)                | Gateway entry plasmid: BP recombination of the PCR product (oligos O-835/O-837 using C1189 as template) with pDONR <sup>TM</sup> / Zeo                                   | This study                                      |
| C1197 | pGST-KIF1Bβ(1324-end)                 | LR recombination of C1193 with pDEST-15. Expression of GST- KIF1Bβ(1324-end) in <i>E. coli</i>                                                                           | This study                                      |
| C1198 | P[His] <sub>6</sub> -KIF1Bβ(1324-end) | LR recombination of C1193 with pDEST-17. Expression of [His] <sub>6</sub> - KIF1Bβ(1324-end) in <i>E. coli</i>                                                           | This study                                      |
| C1190 | pCB6-HA-KHC                           | Expression of HA-KHC (rat KIF5C) in eukaryotic cells                                                                                                                     | (Sanger et al., 2017)                           |
| C1192 | pCB6-HA-KLC2                          | Expression of HA-KLC (mouse KLC2) in eukaryotic cells                                                                                                                    | (Sanger et al., 2017)                           |
| C974  | pGG2-CFP                              | pFPV25 derivative for <i>Salmonella</i> expression of CFP under control of the rpsM promoter                                                                             | (Moest et al., 2018)                            |

**Table S2. Oligonucleotides used in this study**

|       |                  |                                                                   |
|-------|------------------|-------------------------------------------------------------------|
| O-680 | PLEKHM2GWFw      | GGGGACAAGTTTGTACAAAAAAGCAGGCTTCGAGCCGGGGAGGTGAAGGACC              |
| O-681 | PLEKHM2GWRRev    | GGGGACCACTTTGTACAAGAAAGCTGGGTCTATCAGCACAGGGGTCTCGGGAGGC           |
| O-691 | WZ05F            | GGGGACAAGTTTGTACAAAAAAGCAGGCTTCATTTTAAATCGCATCCACAATGACGGCC       |
| O-693 | WZ07-R336        | GGGGACCACTTTGTACAAGAAAGCTGGGTCTATAAAAAACAACATAAACAGCCGCTTTGTTG    |
| O-780 | SKIP 311-X_GW_fw | GGGGACAAGTTTGTACAAAAAAGCAGGCTTCGAGGTCATCAGGGTCACCAAGAAG           |
| O-835 | KIF1B(1324-) FW  | GGGGACAAGTTTGTACAAAAAAGCAGGCTTCGGTAGTCCAGGTATGCAGAGAAGGAG         |
| O-837 | KIF1B(-STOP)Rev  | 5'-GGGGACCACTTTGTACAAGAAAGCTGGGTCTTAGTATTTGACTGGCTCGGGCATC-3'     |
| O-869 | GW FW PLEKHM1    | GGGGACAAGTTTGTACAAAAAAGCAGGCTTCCTTTCAAGTGGTGGAGAATGGACTG          |
| O-870 | GW Rev PLEKHM1   | GGGGACCACTTTGTACAAGAAAGCTGGGTCTTAAACGGCGAAAATGTTCTGTTCC           |
| O-871 | GW FW KIF1Bβ     | 5'-GGGGACAAGTTTGTACAAAAAAGCAGGCTTCGGATCGGGAGCCTCAGTGAAG-3'        |
| O-885 | KIF1B(-1561)Rev  | 5'-GGGGACCACTTTGTACAAGAAAGCTGGGTCTTAAACAAGATTGAGAAATTCGTTTTTCC-3' |
| O-904 | KIF1Bβ(363-)FW   | 5'-GGGGACAAGTTTGTACAAAAAAGCAGGCTTCGTTCTGTAATTAAGGAGGAGG-3'        |

**Table S3. Bacterial strains**

| Name      | Description                                                                                                            | Reference                |
|-----------|------------------------------------------------------------------------------------------------------------------------|--------------------------|
| 12023     | Wild-type <i>S. Typhimurium</i> ( <i>Salmonella enterica</i> subsp. <i>enterica</i> serovar Typhimurium), strain 12023 | Laboratory stock         |
| AAG020    | 12023 <i>pipB2-2HAchr::FRT</i>                                                                                         | This study               |
| HH109     | 12023 <i>ssaV::aphT</i>                                                                                                | (Deiwick et al., 1998)   |
| 126       | 12023 <i>sseJ-2HAchr::FRT</i>                                                                                          | Provided by D.W. Holden  |
| WZ040G    | 12023 <i>sifA-2HA(L130D)chr::FRT</i>                                                                                   | (Zhao and Méresse, 2015) |
| AAG022sc4 | 12023 <i>pipB2-2HAchr::FRT, ΔsifA::FRT</i>                                                                             | (Schroeder et al., 2010) |
| TM29      | 12023 <i>pipB2-2HAchr::FRT, ΔsseF::km</i>                                                                              | This study               |
| AAG023    | 12023 <i>pipB2-2HAchr::FRT, ΔsopD2::Cm</i>                                                                             | This study               |
| YZ012     | 12023 <i>ΔsspH2::FRT</i>                                                                                               | Provided by D.W. Holden  |
| 127       | 12023 <i>ΔsseJ::km</i>                                                                                                 | (Henry et al., 2006)     |
| AAG04     | 12023 <i>SseJ-2HAchr::FRT, ΔpipB2::km</i>                                                                              | This study               |
| TH146     | 12023 <i>ΔsifA::FRT, ΔpipB2::km</i>                                                                                    | (Henry et al., 2006)     |
| PH011     | 12023 <i>ΔsifA::FRT, psifA-2HA</i>                                                                                     | (Boucrot et al., 2005)   |

FRT: 128 bp scar remaining after excision of the antibiotic resistance FRT cassette (Datsenko and Wanner, 2000).

## Supplementary References

- Boucrot, E., Henry, T., Borg, J.-P., Gorvel, J.-P. and Méresse, S.** (2005). The intracellular fate of Salmonella depends on the recruitment of kinesin. *Science* **308**, 1174–1178.
- Datsenko, K. A. and Wanner, B. L.** (2000). One-step inactivation of chromosomal genes in Escherichia coli K-12 using PCR products. *Proc. Natl. Acad. Sci. USA* **97**, 6640–6645.
- Deiwick, J., Nikolaus, T., Shea, J. E., Gleeson, C., Holden, D. W. and Hensel, M.** (1998). Mutations in Salmonella pathogenicity island 2 (SPI2) genes affecting transcription of SPI1 genes and resistance to antimicrobial agents. *J Bacteriol* **180**, 4775–4780.
- Deiwick, J., Salcedo, S. P., Boucrot, E., Gilliland, S. M., Henry, T., Petermann, N., Waterman, S. R., Gorvel, J.-P., Holden, D. W. and Méresse, S.** (2006). The translocated Salmonella effector proteins SseF and SseG interact and are required to establish an intracellular replication niche. *Infect. Immun.* **74**, 6965–6972.
- Diacovich, L., Dumont, A., Lafitte, D., Soprano, E., Guilhon, A.-A., Bignon, C., Gorvel, J.-P., Bourne, Y. and Méresse, S.** (2009). Interaction between the SifA virulence factor and its host target SKIP is essential for Salmonella pathogenesis. *J. Biol. Chem.* **284**, 33151–33160.
- Dumont, A., Boucrot, E., Drevensek, S., Daire, V., Gorvel, J.-P., Poüs, C., Holden, D. W. and Méresse, S.** (2010). SKIP, the host target of the Salmonella virulence factor SifA, promotes kinesin-1-dependent vacuolar membrane exchanges. *Traffic* **11**, 899–911.
- Guardia, C. M., Farías, G. G., Jia, R., Pu, J. and Bonifacino, J. S.** (2016). BORC Functions Upstream of Kinesins 1 and 3 to Coordinate Regional Movement of Lysosomes along Different Microtubule Tracks. *Cell Rep* **17**, 1950–1961.
- Henry, T., Couillault, C., Rockenfeller, P., Boucrot, E., Dumont, A., Schroeder, N., Hermant, A., Knodler, L. A., Lecine, P., Steele-Mortimer, O., et al.** (2006). The Salmonella effector protein PipB2 is a linker for kinesin-1. *Proc. Natl. Acad. Sci. USA* **103**, 13497–13502.
- Moest, T., Zhao, W., Zhao, Y., Schüssler, J. M., Yan, W., Gorvel, J.-P. and Méresse, S.** (2018). Contribution of bacterial effectors and host proteins to the composition and function of Salmonella-induced tubules. *Cell. Microbiol.* **20**, e12951.
- Sanger, A., Yip, Y. Y., Randall, T. S., Pernigo, S., Steiner, R. A. and Dodding, M. P.** (2017). SKIP controls lysosome positioning using a composite kinesin-1 heavy and light chain-binding domain. *J Cell Sci* **130**, 1637–1651.
- Schlisio, S., Kenchappa, R. S., Vredevel, L. C. W., George, R. E., Stewart, R., Greulich, H., Shahriari, K., Nguyen, N. V., Pigny, P., Dahia, P. L., et al.** (2008). The kinesin KIF1Bbeta acts downstream from Egln3 to induce apoptosis and is a potential 1p36 tumor suppressor. *Genes Dev.* **22**, 884–893.

**Schroeder, N., Henry, T., de Chastellier, C., Zhao, W., Guilhon, A.-A., Gorvel, J.-P. and Méresse, S.** (2010). The virulence protein SopD2 regulates membrane dynamics of Salmonella-containing vacuoles. *PLoS Pathog.* **6**, e1001002.

**Zhao, W. and Méresse, S.** (2015). A method to introduce an internal tag sequence into a salmonella chromosomal gene. *Methods Mol. Biol.* **1225**, 81–92.

**Zhao, W., Moest, T., Zhao, Y., Guilhon, A.-A., Buffat, C., Gorvel, J.-P. and Méresse, S.** (2015). The Salmonella effector protein SifA plays a dual role in virulence. *Sci Rep* **5**, 12979.
